# Supplementary material
Source: PubMed Central journal article supplement (PMC1892916)

start

1

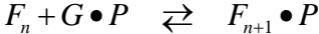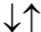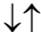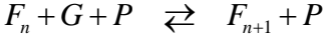

2

end

Supplement: pnas_0607052104_1.pdf [file pnas_0607052104_1.pdf]

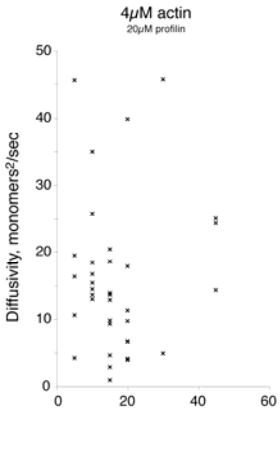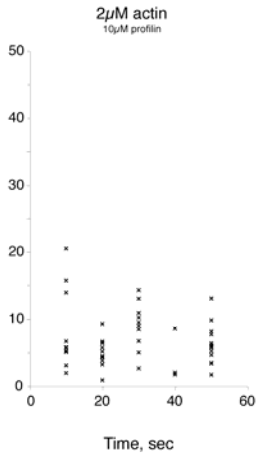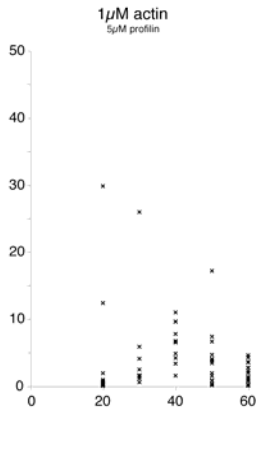

Supplement: pnas_0607052104_2.pdf [file pnas_0607052104_2.pdf]
